## Bone Metabolism in Adolescent Boys with Anorexia Nervosa

Madhusmita Misra, Debra K. Katzman, Jennalee Cord, Stephanie J. Manning, Nara Mendes, David B. Herzog, Karen K. Miller, and Anne Klibanski

Neuroendocrine Unit (M.M., J.C., N.M., K.K.M., A.K.) and Harris Center (D.B.H.), Massachusetts General Hospital and Harvard Medical School, and Pediatric Endocrine Unit (M.M.), Massachusetts General Hospital for Children and Harvard Medical School, Boston, Massachusetts 02114; and Division of Adolescent Medicine (D.K.K., S.J.M.), Children, Toronto, Ontario, Canada M5G 1X8

**Background:** Anorexia nervosa (AN) is a condition of severe undernutrition associated with low bone mineral density (BMD) in adolescent females with this disorder. Although primarily a disease in females, AN is increasingly being recognized in males. However, there are few or no data regarding BMD, bone turnover markers or their predictors in adolescent AN boys.

**Hypotheses:** We hypothesized that BMD would be low in adolescent boys with AN compared with controls associated with a decrease in bone turnover markers, and that the gonadal steroids, testosterone and estradiol, and levels of IGF-I and the appetite regulatory hormones leptin, ghrelin, and peptide YY would predict BMD and bone turnover markers.

**Methods:** We assessed BMD using dual-energy x-ray absorptiometry and measured fasting testosterone, estradiol, IGF-I, leptin, ghrelin, and peptide YY and a bone formation (aminoterminal propeptide of type 1 procollagen) and bone resorption (N-telopeptide of type 1 collagen) marker in 17 AN boys and 17 controls 12–19 yr old.

**Results:** Boys with AN had lower BMD and corresponding Z-scores at the spine, hip, femoral neck, trochanter, intertrochanteric region, and whole body, compared with controls. Height-adjusted measures (lumbar bone mineral apparent density and whole body bone mineral content/height) were also lower. Bone formation and resorption markers were reduced in AN, indicating decreased bone turnover. Testosterone and lean mass predicted BMD. IGF-I was an important predictor of bone turnover markers.

**Conclusion:** AN boys have low BMD at multiple sites associated with decreased bone turnover markers at a time when bone mass accrual is critical for attainment of peak bone mass. (*J Clin Endocrinol Metab* 93: 3029–3036, 2008)

Anorexia nervosa (AN), a condition of severe undernutrition, is associated with very low bone mineral density (BMD) in adolescent girls and adult women (1–5). Low BMD in AN girls (1, 2, 4–6) is associated with decreased levels of bone turnover markers (4, 5), in contrast to adults with AN, who have an uncoupling of these markers (3). Although predominantly a disease of females, AN is increasingly recognized in males (7, 8), and yet there are no controlled studies assessing BMD and bone turnover markers in AN boys. In the one uncontrolled study

published (9), which did not examine bone turnover markers, boys with the lowest BMD had the longest duration of illness, and lowest physical activity and calcium intake.

BMD assessment by dual-energy x-ray absorptiometry (DXA) has inherent flaws in that it measures areal rather than true or volumetric BMD, and underestimates BMD in shorter children and overestimates BMD in taller children (10). Given the high prevalence of short stature in AN boys (11), it is important to examine height adjusted measures such as lumbar

0021-972X/08/\$15.00/0

Printed in U.S.A.

Copyright © 2008 by The Endocrine Society

doi: 10.1210/jc.2008-0170 Received January 23, 2008. Accepted May 29, 2008.

First Published Online June 10, 2008

Abbreviations: AN, Anorexia nervosa; BMAD, bone mineral apparent density; BMD, bone mineral density; BMI, body mass index; CV, coefficient of variation; DXA, dual-energy x-ray absorptiometry; FAI, free androgen index; NTX, N-telopeptide; PINP, aminoterminal propeptide of type 1 collagen; PYY, peptide YY; SDS, SD scores; WB BMC, whole-body bone mineral content.

spine bone mineral apparent density (BMAD) (12), reported to be the most consistent predictor of upper limb fracture risk in children (13), and whole-body bone mineral content (WB BMC) adjusted for height, which compares well with peripheral quantitative computed tomography data for bone strength (14). Of note, surrogate markers of bone formation and bone resorption provide information regarding the state of bone turnover but have not been examined in males with AN.

During adolescence, a marked increase in bone accrual occurs as a consequence of rising GH, IGF-I (15), and gonadal steroid levels. Increases in GH and IGF-I secretion induce increases in periosteal bone apposition in early to mid puberty, and rising levels of gonadal steroids cause decreases in endosteal bone resorption in later puberty. Whereas estradiol is primarily antiresorptive, testosterone has both direct bone anabolic effects and antiresorptive effects from aromatization to estradiol (16). Conditions of severe undernutrition, including AN, are associated with low IGF-I and hypothalamic amenorrhea in females (5). Although hypogonadotropic hypogonadism has not been as well characterized in males with AN, this is anticipated, given the negative energy balance state, an important predictor of impaired gonadotropin pulsatility (17, 18). Only one study has examined associations of IGF-I and testosterone with BMD in AN boys and reported no associations between these variables (9). In addition, recent data demonstrate that orexigenic and anorexigenic hormones such as ghrelin, leptin, and peptide YY (PYY) affect gonadotropin secretion (19–22) and impact bone metabolism (23–27). Ghrelin, a stomach-derived orexigenic hormone, is elevated in females with AN and has osteoblast proliferative effects (25, 26). PYY is also high in AN girls and inversely predicts bone turnover markers (28). Leptin, an adipokine that is down-regulated in females with AN, has been variably reported to be a positive (24, 29) or negative (27) regulator of bone metabolism. Low leptin in particular is seen in states of low fat mass but has not been assessed in boys with AN.

In addition to hormonal changes, adolescence is characterized by changes in body composition, and boys in particular have marked increases in lean mass, a consistent predictor of BMD (4, 5, 30), likely from biomechanical forces exerted by the pull of muscle on growing bone. Body composition in AN boys and associations with BMD have not been reported.

In this study, we examined absolute and height-adjusted measures of BMD and levels of bone turnover markers in adolescent boys with AN and controls of similar maturity as well as predictors of these measures. We hypothesized that adolescent AN boys would have lower BMD and bone turnover markers than controls, even after adjusting for stature, and that BMD would be predicted by body composition, gonadal steroids, IGF-I, and appetite-regulating hormones.

## Subjects and Methods

### Subject selection

Seventeen adolescent boys with AN (diagnosed by *Diagnostic and Statistical Manual of Mental Disorders-IV* criteria) (chronological age  $16.0 \pm 1.8$  yr, bone age  $16.2 \pm 1.5$  yr), and 17 healthy boys of compa-

rable chronological ( $15.6 \pm 1.9$  yr) and bone age ( $16.0 \pm 2.3$  yr) were examined. All subjects were between 12 and 19 yr old. Mean duration since diagnosis was  $11.9 \pm 16.3$  months and age at diagnosis,  $15.0 \pm 1.9$  yr in AN. None of the controls had a present or past history of eating disorders, and all were greater than 90% ideal body weight based on the 50th percentile of body mass index (BMI) for age. Six AN boys were on selective serotonin reuptake inhibitors, three on a serotonin norepinephrine reuptake inhibitor, two on risperidone, one on olanzapine, one on valproate, and 11 on multivitamin/calcium supplements. In contrast, only two controls were on multivitamin/calcium supplements. Subjects were mostly white but did include one black and one Asian boy (both controls). For boys with AN, methods of recruitment included referrals from Eating Disorders Units in New England and the Hospital for Sick Children (Toronto, Canada). Controls were recruited through mass mailings to pediatricians, nutritionists, and psychiatrists. The study was approved by the Institutional Review Board of Partners Health Care (Boston, MA) and the Research Ethics Board of the Hospital for Sick Children. Informed assent and consent obtained from all subjects and their parents.

### Experimental protocol

Subjects were admitted to the General Clinical Research Center of Massachusetts General Hospital, Boston, or the Clinical Investigation Unit of the Hospital for Sick Children. Conditions other than AN that may affect bone metabolism excluded subjects from study participation. All subjects had hematocrits greater than 30%, potassium greater than 3 mmol/liter, FSH less than 10 U/liter, and glucose greater than 50 mg/dl. At the study visit, height was measured in triplicate and averaged. Weight was measured on an electronic scale in the fasting state. BMI was calculated as the ratio of weight (in kilograms)/height (in meters)<sup>2</sup>. Bone age was read by a single pediatric endocrinologist (31).

Fasting blood was obtained for IGF-I, testosterone, SHBG, estradiol, active ghrelin, PYY, and leptin. BMD and body composition were measured by DXA (Hologic 4500, Hologic, Waltham, MA). Z-scores were calculated using Hologic reference databases (32). To correct for body size, BMAD was calculated for the spine (10) and measures of WB BMC/height examined. The coefficient of variation (CV) for spine and WB BMD was 1.1 and 0.8% and fat and lean mass 2.1 and 1.0%, respectively. Cross-calibration of the Hologic 4500 instruments at the two sites was performed using phantoms provided by Synarc (San Francisco, CA). We measured fasting levels of one serum marker of bone formation, namely aminoterminal propeptide of type 1 collagen (PINP), and bone resorption, namely N-telopeptide (NTX).

Activity scores were derived from an exercise questionnaire validated for use in adolescents (33) and calcium and vitamin D intake assessed using a food frequency questionnaire administered by dietitians at the respective sites. Data regarding calcium and vitamin D intake were available in 16 AN boys and 13 controls.

### Biochemical assessment

RIA was used to measure serum leptin (Linco Diagnostics, Inc., St. Louis, MO; sensitivity 0.5 ng/ml, CV 3.4–8.3%) and active ghrelin (Linco, St. Louis, MO; sensitivity 7.8 pg/ml, CV 7.4%), and immunoradiometric assay to measure IGF-I (detection limit 2.06 ng/ml, CV 3.9%). PYY was measured using ELISA (Millipore/Linco Research Inc., St. Charles, MO; sensitivity 1.4 pg/ml; CV 1.5%, –2.7%). RIA was used to measure testosterone (Diagnostic Products Corp., Los Angeles, CA; CV 5.1–9.8%, sensitivity 4 ng/dl) and estradiol (Diagnostic Systems Laboratories, Webster, TX; CV 6.5–8.9%, sensitivity 2.2 pg/ml) and immunoradiometric assay to measure SHBG (Diagnostic Products; CV 2.8–5.3%; sensitivity 0.04 nmol/liter). Free androgen index (FAI) was calculated as total testosterone/SHBG. PINP was measured by a RIA (Orion Diagnostica Oy, Espoo, Finland; detection limit 2 ng/ml; CV 6.5–10.2%) and NTX by an enzyme immunoassay [Osteomark-Wampole Laboratories, Inverness Medical Professional Diagnostics, Princeton, NJ; detection limit 2.5 nM bone collagen equivalent, CV 4.6%]. Samples were stored at –80 C until analysis and run in duplicate.

**TABLE 1.** Clinical characteristics of adolescent boys with AN and healthy adolescent boys

|                                  | Controls<br>(n = 17) | AN<br>(n = 17) | P       |
|----------------------------------|----------------------|----------------|---------|
| Chronological age (yr)           | 15.6 ± 1.9           | 16.0 ± 1.8     | NS      |
| Bone age (yr)                    | 16.0 ± 2.4           | 16.2 ± 1.5     | NS      |
| Testicular volume (ml)           | 17.8 ± 6.6           | 11.5 ± 6.2     | 0.01    |
| Height (cm)                      | 169.3 ± 8.8          | 170.7 ± 10.3   | NS      |
| Height SDS                       | 0.05 ± 1.27          | −0.12 ± 1.12   | NS      |
| Weight (kg)                      | 61.2 ± 9.6           | 50.7 ± 9.7     | 0.003   |
| Weight SDS                       | 0.10 ± 0.76          | −1.04 ± 0.72   | <0.0001 |
| BMI (kg/m <sup>2</sup> )         | 21.3 ± 2.6           | 17.2 ± 1.6     | <0.0001 |
| BMI SDS                          | 0.12 ± 0.75          | −1.19 ± 0.42   | <0.0001 |
| Fat mass (kg)                    | 10.2 ± 3.5           | 6.9 ± 2.2      | 0.002   |
| Lean mass (kg)                   | 50.4 ± 8.5           | 43.7 ± 8.4     | 0.03    |
| Body fat (%)                     | 16.3 ± 4.9           | 13.1 ± 3.4     | 0.04    |
| Composite activity scores (h/wk) | 18.1 ± 17.8          | 12.1 ± 9.8     | NS      |

Mean ± sd. NS, Not significant.

### Statistical analysis

Data were analyzed using the JMP program (version 4; SAS Institute Inc., Cary, NC) and are presented as mean ± sd. The Student *t* test was used to calculate differences between means. Where data were not normally distributed, logarithmic conversions were performed to approximate a normal distribution. This was required for active ghrelin. *P* < 0.05 was considered significant. Univariate and mixed model stepwise regression analyses (*P* = 0.15 for entry and *P* = 0.10 to leave the model) were used to determine predictors of hormonal and BMD measures. All correlations relate to the group as a whole, unless otherwise specified. Variables entered into the regression model were based on data from correlational analysis and known predictors of various parameters.

## Results

### Clinical characteristics (Table 1)

As per study design, AN boys did not differ from controls for chronological or bone age. However, in AN, duration since diagnosis correlated inversely with the difference between bone age and chronological age (*r* = −0.67, *P* = 0.004), such that boys with longest duration since diagnosis had the lowest bone age in relation to chronological age.

As expected, AN boys had lower weight, BMI, and fat and lean mass than controls. However, height and height sd scores (SDS) did not differ. Although AN boys were not shorter than controls, within AN boys, height SDS was associated strongly and positively with BMI SDS (*r* = 0.71, *P* = 0.001) and inversely with duration since diagnosis (*r* = −0.59, *P* = 0.01). Midparental height (genetic potential) and predicted adult height (based on current height and bone age) did not differ between groups, and neither did corresponding SDS. The difference between predicted adult height and midparental height was lower in AN than controls but did not reach significance (−0.91 ± 5.0 vs. 2.8 ± 9.3 cm). Similar results were observed for differences in corresponding SDS. Duration since diagnosis correlated inversely with the difference between height SDS and midparental height SDS (*r* = −0.62, *P* = 0.008), such that boys with longer duration of illness had lower height SDS, compared with genetic potential.

**TABLE 2.** Hormonal alterations in adolescent boys with AN and controls

|                        | Controls<br>(n = 17) | AN<br>(n = 17) | P     |
|------------------------|----------------------|----------------|-------|
| IGF-I (ng/ml)          | 580 ± 238            | 483 ± 275      | NS    |
| Testosterone (ng/dl)   | 413.8 ± 223.2        | 186.8 ± 147.7  | 0.004 |
| SHBG (nmol/liter)      | 43.1 ± 28.0          | 42.9 ± 20.8    | NS    |
| FAI                    | 45.8 ± 31.3          | 21.0 ± 21.7    | 0.02  |
| Estradiol (pg/ml)      | 18.0 ± 7.2           | 12.0 ± 4.6     | 0.01  |
| Active ghrelin (pg/ml) | 48.1 ± 29.6          | 58.2 ± 22.1    | NS    |
| Leptin (ng/ml)         | 3.5 ± 3.2            | 2.0 ± 0.9      | NS    |
| PYY (pg/ml)            | 64.3 ± 28.7          | 119.2 ± 57.5   | 0.003 |
| Glucose (mg/dl)        | 85.6 ± 4.5           | 75.2 ± 12.1    | 0.009 |

Mean ± sd. NS, Not significant.

Compared with controls, AN boys had higher calcium (1706 ± 544 vs. 1172 ± 396 mg/d, *P* = 0.006) and vitamin D intake (536 ± 248 vs. 285 ± 202 IU/d, *P* = 0.007) from food and supplements. Overall, more AN than controls met the dietary reference index for calcium (87 vs. 33%, *P* = 0.005) and vitamin D intake (69 vs. 15%, *P* = 0.005).

### Hormonal parameters and their predictors

The groups did not differ for Tanner stage (4.4 ± 1.0 in controls vs. 4.1 ± 1.4 in AN). However, AN boys had lower testicular volume than controls (Table 1) and lower testosterone, FAI, and estradiol (Table 2). PYY was higher in AN, whereas ghrelin and leptin did not differ between groups. Predictors of hormonal parameters are reported in Table 3. Associations of testosterone with various parameters were similar to those of FAI, and only associations with testosterone are reported. BMI and fat and lean mass correlated positively with gonadal steroids and inversely with PYY. We observed positive associations of BMI and fat mass with leptin and inverse associations of lean mass with ghrelin. We found no associations of BMI, fat mass, or leptin with IGF-I, although PYY correlated inversely with IGF-I. Active ghrelin and PYY correlated inversely with testicular volume and gonadal steroids. Within AN, duration since diagnosis predicted ghrelin (*r* = 0.62, *P* = 0.01) but not leptin or PYY. Strong positive associations were observed between gonadal steroids and IGF-I. On regression modeling (BMI, ghrelin, and leptin added to the model), BMI and leptin predicted testosterone (56% of variability). When PYY was added to the model, predictors of testosterone were BMI and PYY (69% of variability explained).

### Bone density and markers of bone turnover and their predictors

Boys with AN had lower BMD and BMD Z-scores at the spine, hip, and whole body than controls (Table 4 and Fig. 1). In addition to the total hip, measures of femoral neck, trochanteric and intertrochanteric BMD, and corresponding Z-scores were lower in AN. Height-adjusted measures of bone density including lumbar BMAD and WB BMC/height Z-scores were also lower. Lumbar and WB BMD in AN was 90 and 95% of that in controls, whereas hip, femoral neck, and trochanteric and intertrochanteric BMD were 86, 88, 85, and 85% of control values,

**TABLE 3.** Predictors of hormonal parameters for all subjects

|              | BMI                | Fat mass           | Lean mass          | Testicular volume  | Testo-sterone      | Estradiol          | IGF-I              | Ghrelin <sup>a</sup> | Leptin |
|--------------|--------------------|--------------------|--------------------|--------------------|--------------------|--------------------|--------------------|----------------------|--------|
| Testosterone | 0.66 <sup>b</sup>  | 0.45 <sup>c</sup>  | 0.74 <sup>d</sup>  | 0.75 <sup>d</sup>  |                    | 0.63 <sup>b</sup>  | 0.41 <sup>c</sup>  | −0.37 <sup>c</sup>   | 0.05   |
| Estradiol    | 0.49 <sup>e</sup>  | 0.23               | 0.59 <sup>e</sup>  | 0.56 <sup>e</sup>  | 0.63 <sup>b</sup>  |                    | 0.32               | −0.52 <sup>e</sup>   | −0.11  |
| IGF-I        | 0.09               | 0.16               | 0.23               | 0.45 <sup>c</sup>  | 0.41 <sup>c</sup>  | 0.32               |                    | −0.14                | 0.01   |
| Ghrelin*     | −0.22              | 0.03               | −0.47 <sup>c</sup> | −0.46 <sup>c</sup> | −0.37 <sup>c</sup> | −0.52 <sup>e</sup> | −0.14              |                      | 0.28   |
| Leptin       | 0.48 <sup>e</sup>  | 0.70 <sup>d</sup>  | −0.06              | −0.15              | 0.05               | −0.11              | 0.01               | 0.28                 |        |
| PYY          | −0.45 <sup>c</sup> | −0.37 <sup>c</sup> | −0.50 <sup>e</sup> | −0.60 <sup>e</sup> | −0.62 <sup>e</sup> | −0.42 <sup>c</sup> | −0.50 <sup>c</sup> | 0.28                 | −0.01  |

<sup>a</sup> Log conversions performed to approximate a normal distribution.

<sup>b</sup>  $P < 0.001$ .

<sup>c</sup>  $P < 0.05$ .

<sup>d</sup>  $P < 0.0001$ .

<sup>e</sup>  $P < 0.01$ .

respectively. More AN boys than controls had BMD Z-scores less than  $-1$  at the hip and its subregions (Table 4). The difference between groups was even more marked when Z-scores were calculated based on bone age (data not reported). Levels of PINP and NTX were significantly lower in AN than controls (Fig. 2).

BMD measures were positively associated with BMI, lean mass, and gonadal status but not fat mass (Table 5). PYY was an inverse predictor of BMD. In AN boys, duration since diagnosis, activity scores, and calcium or vitamin D intake did not predict BMD. On regression modeling to account for confounding variables, with bone age, BMI, lean mass, total testosterone, estradiol, and PYY entered into the model (Table 6), we observed that testosterone independently predicted lumbar BMD, whereas BMI was the single most significant predictor of hip and femoral neck BMD. Lean mass and bone age predicted WB BMC/height measures, and lean mass was also an independent predictor of lumbar and WB BMD. BMD Z-scores at the corresponding sites were predicted by similar variables and are not reported. Figure 3 shows associations of BMD with independent predictors assessed using regression modeling.

IGF-I was a strong predictor of PINP ( $r = 0.53$ ,  $P = 0.007$ ) and a weaker predictor of NTX ( $r = 0.39$ ,  $P = 0.06$ ). On regression modeling, IGF-I was the sole independent predictor of NTX (accounting for 15% of the variability), whereas IGF-I and lean mass accounted for 44% of the variability in PINP. Other hormonal and body composition parameters did not predict bone turnover markers. PINP correlated positively with NTX ( $r = 0.63$ ,  $P = 0.001$ ).

## Discussion

We report for the first time lower BMD and height adjusted measures of BMD, including corresponding Z-scores, at multiple sites in adolescent boys with AN, compared with controls. In addition, we report for the first time that lower BMD in AN boys is associated with a reduced bone turnover state as indicated by surrogate markers of bone formation and resorption. In addition to low BMI and lean mass, low testosterone is an important predictor of low BMD.

**TABLE 4.** Bone density and bone turnover markers in adolescent boys with AN and healthy adolescent boys

|                                              | Controls (n = 17) | AN (n = 17)   | P       |
|----------------------------------------------|-------------------|---------------|---------|
| Lumbar spine BMD Z-score                     | −0.14 ± 0.81      | −1.09 ± 0.98  | 0.004   |
| Lumbar BMD Z-score less than $-1$            | 23.5%             | 50.0%         | NS      |
| Lumbar spine BMAD Z-score                    | −0.07 ± 0.16      | −0.32 ± 0.33  | 0.008   |
| Lumbar spine BMAD Z-score less than $-1$     | 0%                | 5.9%          | NS      |
| Total hip BMD Z-score                        | −0.06 ± 0.81      | −1.23 ± 0.99  | 0.0008  |
| Total hip BMD Z-score less than $-1$         | 23.5%             | 58.8%         | 0.04    |
| Femoral neck BMD Z-score                     | −0.23 ± 0.94      | −1.17 ± 0.82  | 0.004   |
| Femoral neck BMD Z-score less than $-1$      | 17.7%             | 64.7%         | 0.007   |
| Trochanteric BMD Z-score                     | −0.08 ± 0.64      | −1.22 ± 0.80  | <0.0001 |
| Trochanteric BMD Z-score less than $-1$      | 5.9%              | 70.6%         | 0.0001  |
| Intertrochanteric BMD Z-score                | 0.07 ± 0.88       | −1.14 ± 1.18  | 0.002   |
| Intertrochanteric BMD Z-score less than $-1$ | 17.7%             | 58.8%         | 0.02    |
| Whole-body BMD Z-score                       | −0.27 ± 0.76      | −1.09 ± 1.14  | 0.02    |
| Whole-body BMD Z-score less than $-1$        | 23.5%             | 43.8%         | NS      |
| WB BMC/height Z-score                        | 0.13 ± 0.75       | −0.80 ± 0.77  | 0.001   |
| WB BMC/height Z-score less than $-1$         | 0%                | 29.4%         | 0.02    |
| PINP (ng/ml)                                 | 259.3 ± 112.8     | 166.3 ± 99.7  | 0.04    |
| NTX/cr (nmol BCE)                            | 320.8 ± 205.5     | 166.6 ± 134.7 | 0.04    |

Mean ± sd. cr, Creatinine; BCE, bone collagen equivalent; NS, not significant.

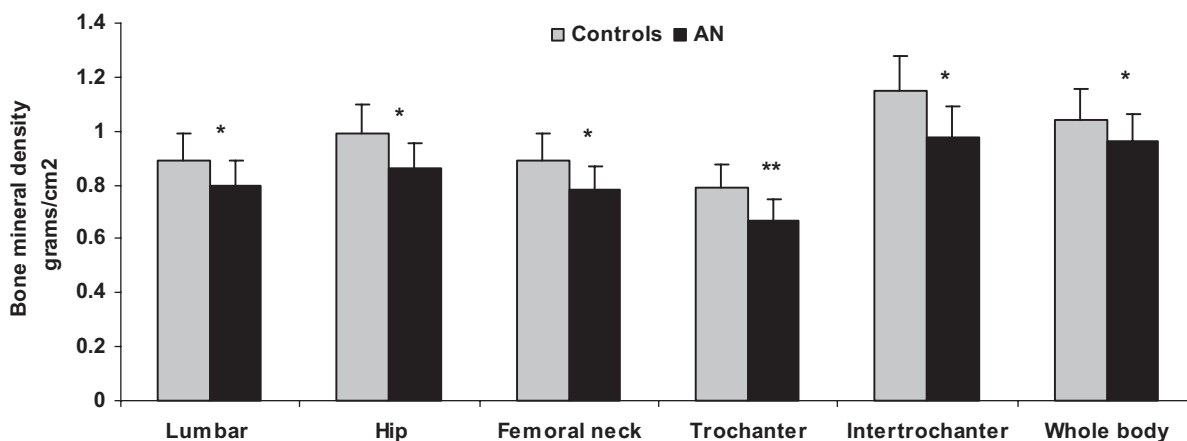

**FIG. 1.** Bone density in adolescent boys with anorexia nervosa and controls. Bone density at the lumbar spine, total hip, and its subregions (femoral neck, trochanter, intertrochanteric region) and the whole body was significantly lower in boys with AN than in controls. \*,  $P < 0.05$ ; \*\*,  $P < 0.01$ .

There are no controlled studies thus far that have reported on bone metabolism in boys with AN, and the only uncontrolled study showed that a longer duration of illness, lower levels of physical activity, and lower calcium intake predicted lower spine BMD (9). Unlike our study, this study did not compare AN boys against controls of comparable maturity or control for height.

We observed markedly lower BMD at the spine, hip, femoral neck, trochanter, intertrochanteric region, and whole body in boys with AN, compared with controls of similar maturity, and these differences persisted after adjustments for bone age and for stature, such that lumbar BMAD and WB BMC/height were lower in AN than controls. These data are concerning for low BMD and possibly a decreased rate of bone mass accrual during adolescence, a period characterized by marked increases in bone accrual (34), toward achievement of peak bone mass (35). This also raises concerns regarding bone health and fracture risk in later life. We previously demonstrated that girls with AN have low BMD, and spine BMD is affected preferentially to the hip in females (4). In contrast, in AN boys, the hip and its subregions are affected at least as severely as the spine, based on the proportion of boys whose Z-scores at these sites are less than  $-1$ .

Body composition (4, 6, 36), the gonadal steroids, and IGF-I (37–39) are key determinants of BMD, and in AN girls, the ap-

petite-regulating peptides are also important predictors (40). We therefore examined these parameters in our subjects. As expected, AN boys had lower fat mass, lean mass, testosterone, and estradiol and higher PYY. Unlike in AN girls, ghrelin was not significantly higher in AN boys (41), and IGF-I did not differ between groups. IGF-I levels change rapidly with weight changes, and our subjects were in active nutritional rehabilitation programs. Although BMI was very low in AN boys, an increasing trend from nutritional intervention may explain why IGF-I did not differ between groups. Leptin levels are markedly reduced in AN girls (to 27% of values in controls) (42) and were reduced to a lesser extent in AN boys in our study (to 57% of control values). Because leptin is primarily secreted by adipocytes, relatively lesser decreases in leptin in boys, compared with girls, likely reflect lesser decreases in fat mass in AN boys (32% reduction, compared with controls) *vs.* AN girls (49% reduction) (43) and differences in body composition in pubertal boys *vs.* girls.

Important predictors of BMD were testosterone, lean mass, BMI, and bone age. The gonadal steroids have positive effects on trabecular bone (39), and consistent with this, testosterone was an important and independent predictor of spine BMD. However, testosterone also has important effects on cortical bone, and significant involvement of sites of cortical bone in our study may also be a consequence of lower testosterone levels. In addition, we have demonstrated in AN girls that lean mass and BMI are important predictors of BMD at sites of primarily cortical bone, such as the hip and whole body (4), and our findings in AN boys are consistent with these reports. In contrast to our studies in AN girls, however, the appetite-regulating peptides were not significant predictors of BMD. We did observe inverse associations of PYY with BMD, but PYY did not remain an independent predictor of BMD on regression modeling.

Consistent with the other study in AN boys (9), we found no associations of IGF-I with bone mass. However, in contrast to findings in this study, we also found no associations of BMD with duration since diagnosis, calcium intake, or activity scores. In fact, in our study, the majority of AN boys were on supplements, and more AN than controls met the DRI for calcium and vitamin D intake. This likely reflects the growing awareness on the part

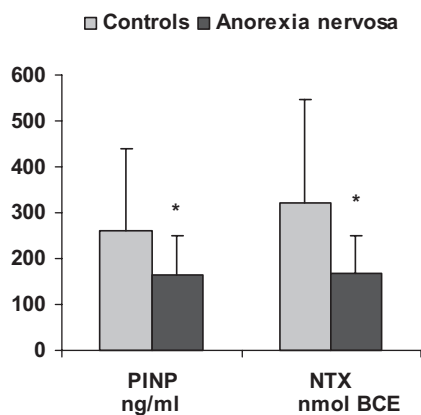

**FIG. 2.** Bone turnover markers in adolescent boys with AN and controls. Levels of PINP (a bone formation marker) and NTX (a bone resorption marker) were significantly lower in boys with AN than controls, suggestive of a reduced state of bone turnover. \*,  $P < 0.05$ . BCE, Bone collagen equivalent.

**TABLE 5.** Body composition and hormonal predictors of bone density measures for all subjects

|                  | BMI               | Fat mass | Lean mass         | Testicular volume | Testosterone      | FAI               | Estradiol         | PYY                |
|------------------|-------------------|----------|-------------------|-------------------|-------------------|-------------------|-------------------|--------------------|
| Lumbar BMD       | 0.59 <sup>a</sup> | 0.22     | 0.79 <sup>b</sup> | 0.67 <sup>a</sup> | 0.72 <sup>b</sup> | 0.69 <sup>b</sup> | 0.44 <sup>c</sup> | −0.46 <sup>c</sup> |
| Lumbar BMAD      | 0.54 <sup>d</sup> | 0.20     | 0.52 <sup>d</sup> | 0.65 <sup>a</sup> | 0.62 <sup>a</sup> | 0.64 <sup>a</sup> | 0.29              | −0.34              |
| Hip BMD          | 0.64 <sup>b</sup> | 0.24     | 0.68 <sup>b</sup> | 0.52 <sup>d</sup> | 0.58 <sup>d</sup> | 0.53 <sup>d</sup> | 0.40 <sup>c</sup> | −0.31              |
| Femoral neck BMD | 0.57 <sup>a</sup> | 0.15     | 0.58 <sup>a</sup> | 0.52 <sup>d</sup> | 0.54 <sup>d</sup> | 0.50 <sup>d</sup> | 0.41 <sup>c</sup> | −0.36 <sup>c</sup> |
| Whole-body BMD   | 0.45 <sup>d</sup> | 0.16     | 0.68 <sup>b</sup> | 0.66 <sup>a</sup> | 0.47 <sup>c</sup> | 0.48 <sup>d</sup> | 0.32              | −0.29              |
| WB BMC/height    | 0.62 <sup>a</sup> | 0.27     | 0.81 <sup>b</sup> | 0.53 <sup>d</sup> | 0.60 <sup>a</sup> | 0.56 <sup>d</sup> | 0.45 <sup>c</sup> | −0.37              |

<sup>a</sup>  $P < 0.001$ .<sup>b</sup>  $P < 0.0001$ .<sup>c</sup>  $P < 0.05$ .<sup>d</sup>  $P < 0.01$ .

of providers of risk for low BMD with low weight and recommendations to take daily supplements. In addition, in adults, increased physical activity and a negative energy balance state have been related to low BMD and increased fracture risk (44, 45), prompting efforts to curtail exercise in AN. Interestingly, studies suggest that excessive physical activity is more likely in males than females with AN (46, 47). The lack of difference in activity scores between subjects and controls may reflect concerns on the part of eating disorder providers regarding associations of very excessive activity with low BMD and recommendations to reduce activity. Of note, the issue of physical activity in AN remains controversial, and one study in AN girls reported that exercise was a positive predictor of BMD (48).

For the first time, we demonstrate that bone turnover markers (both bone formation and bone resorption markers) are reduced in AN boys, compared with controls, who are in a state of increased bone turnover (49). These data are consistent with our reported data in girls with AN (50). The sole significant predictor of both bone turnover markers was IGF-I, consistent with studies in AN girls (36) and the known bone trophic effects of IGF-I (51).

Adjustments for height when assessing BMD are especially important in conditions associated with short stature (10, 12), and AN, a condition of chronic undernutrition, has been associated with statural deficits. Although we did adjust for height in

this study, we did not find any significant differences in stature in AN boys, compared with controls. This is contrast to older studies, which did report short stature in AN (11, 52, 53). It is possible that AN is being diagnosed earlier now, and statural deficits are being prevented by prompt implementation of therapy. Of note, AN boys did demonstrate a positive association of height SDS with BMI SDS, and an inverse association with duration since diagnosis, such that boys with the lowest BMI SDS and longest duration since diagnosis had the lowest height SDS. These data indicate that greater severity and length of illness are associated with shorter stature, consistent with older studies (11, 52, 53).

Limitations of this study relate to use of DXA in assessing BMD in general and more specifically in populations with changing body composition. We have discussed the impact of differences in height on DXA-reported measures of BMD, and corrections to adjust for extremes of height. However, these corrections increase the accuracy of projection techniques to only a limited extent (54). In addition, changes in body composition and fat distribution can cause an over- or underestimation of BMD by DXA (55, 56), and significant alterations in body composition are characteristic of AN. We previously demonstrated, using dual-energy quantitative computed tomography, that marrow fat is increased (57), and sc fat decreased in AN (58).

**TABLE 6.** Predictors of bone density (mixed model stepwise regression modeling: bone age, BMI, lean mass, total testosterone, estradiol)

|                                        | Parameter estimate   | F ratio | P       | Cumulative variability explained by model |
|----------------------------------------|----------------------|---------|---------|-------------------------------------------|
| Lumbar spine BMD (g/cm <sup>2</sup> )  |                      |         |         |                                           |
| Lean mass                              | $4.5 \times 10^{-3}$ | 3.7     | <0.0001 | 0.64                                      |
| Testosterone                           | $1.9 \times 10^{-4}$ | 4.7     | 0.06    | 0.69                                      |
| Bone age                               | $2.0 \times 10^{-2}$ | 3.7     | 0.07    | 0.74                                      |
| Lumbar spine BMAD (g/cm <sup>3</sup> ) |                      |         |         |                                           |
| Testosterone                           | $5.1 \times 10^{-5}$ | 19.2    | 0.0002  | 0.46                                      |
| Hip BMD (g/cm <sup>2</sup> )           |                      |         |         |                                           |
| BMI                                    | 0.037                | 30.2    | <0.0001 | 0.57                                      |
| Femoral neck BMD (g/cm <sup>2</sup> )  |                      |         |         |                                           |
| BMI                                    | 0.028                | 16.7    | 0.0005  | 0.42                                      |
| Whole-body BMD (g/cm <sup>2</sup> )    |                      |         |         |                                           |
| Lean mass                              | $6.4 \times 10^{-3}$ | 14.1    | 0.001   | 0.38                                      |
| WB BMC/height (g/cm)                   |                      |         |         |                                           |
| Lean mass                              | 0.14                 | 13.7    | <0.0001 | 0.64                                      |
| Bone age                               | 0.45                 | 4.6     | 0.04    | 0.70                                      |

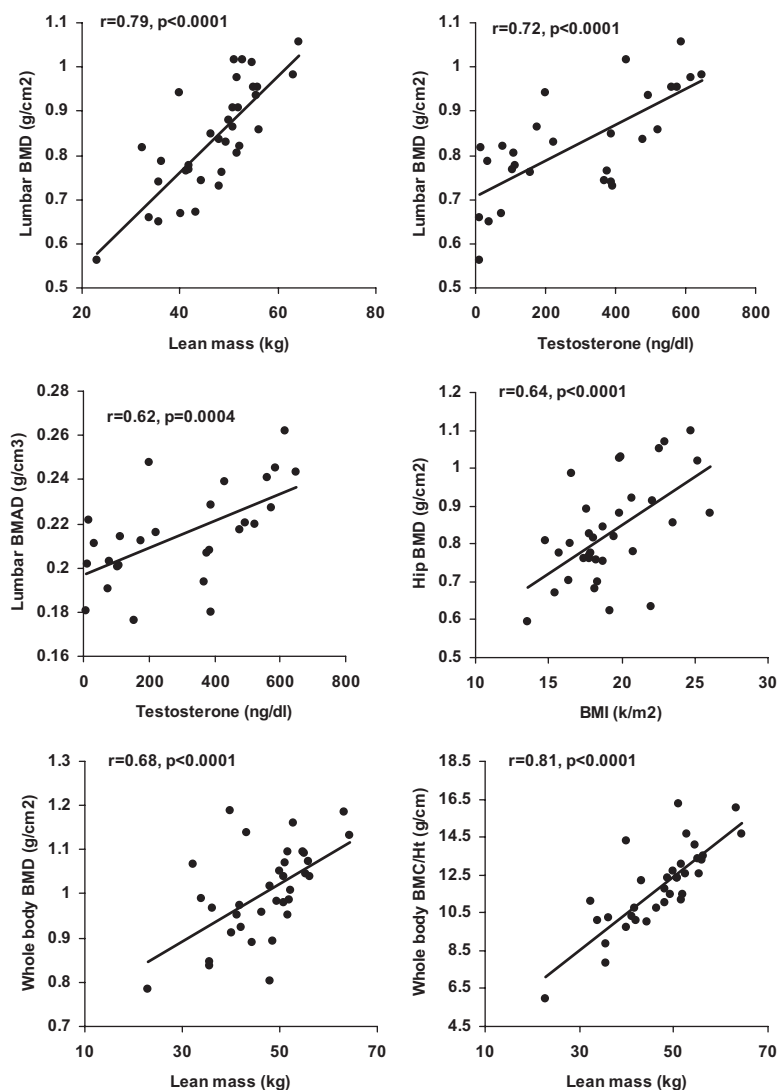

**FIG. 3.** Predictors of bone density in adolescent boys with AN and in controls. Lean body mass and testosterone levels were independent predictors of lumbar bone density measures, whereas BMI was the most significant and independent predictor of bone density at the hip. Lean mass predicted whole-body BMD and bone mineral content adjusted for height.

These alterations could lead to an underreporting of BMD by DXA. However, we have also shown that BMD measured by dual-energy computed tomography is lower in AN women than controls (59), indicating that low BMD reported by DXA in AN is real. Recent studies also indicated changes in bone microarchitecture in women with AN, including a decrease in trabecular number and cortical thickness (60), suggesting that DXA measurements of low BMD are likely valid. Other modalities for assessing BMD are under investigation in AN, but until these are validated, DXA remains the tool available to assess BMD in this condition.

We thus demonstrate lower BMD in adolescent AN boys than in controls, even after adjusting for height, raising concerns with regard to achievement of optimal peak bone mass. Boys with AN are hypogonadal, and lower BMD is predicted by lower testosterone, BMI, and lean mass. Because BMI is an important predictor of low BMD, emphasizing weight recovery is critical.

## Acknowledgments

We thank Ellen Anderson and her bionutrition team as well as the skilled nursing staff of the General Clinical Research Center (Massachusetts General Hospital, Boston, MA) and the Clinical Investigation Unit (Hospital for Sick Children, Toronto, Canada) for their help. In addition, we thank Jeffrey Breu (Core Laboratory, Massachusetts Institute of Technology, Boston, MA) for analyzing our IGF-I, testosterone, SHBG, estradiol, ghrelin, and leptin samples.

Address all correspondence and requests for reprints to: Madhusmita Misra, M.D., BUL 457, Neuroendocrine Unit, Massachusetts General Hospital, 55 Fruit Street, Boston, Massachusetts 02114. E-mail: mmisra@partners.org.

This work was supported in part by National Institutes of Health Grants R01 DK 062249, K23 RR018851, and M01-RR-01066.

Disclosure Statement: All authors have no conflict of interest to report.

## References

1. Audi L, Vargas DM, Gussinye M, Yeste D, Marti G, Carrascosa A 2002 Clinical and biochemical determinants of bone metabolism and bone mass in adolescent female patients with anorexia nervosa. *Pediatr Res* 51:497–504
2. Bachrach L, Guido D, Katzman D, Litt I, Marcus R 1990 Decreased bone density in adolescent girls with anorexia nervosa. *Pediatrics* 86:440–447
3. Grinspoon S, Miller K, Coyle C, Krempin J, Armstrong C, Pitts S, Herzog D, Klibanski A 1999 Severity of osteopenia in estrogen-deficient women with anorexia nervosa and hypothalamic amenorrhea. *J Clin Endocrinol Metab* 84:2049–2055
4. Misra M, Aggarwal A, Miller KK, Almazan C, Worley M, Soyka LA, Herzog DB, Klibanski A 2004 Effects of anorexia nervosa on clinical, hematologic, biochemical, and bone density parameters in community-dwelling adolescent girls. *Pediatrics* 114:1574–1583
5. Soyka L, Misra M, Frenchman A, Miller K, Grinspoon S, Schoenfeld D, Klibanski A 2002 Abnormal bone mineral accrual in adolescent girls with anorexia nervosa. *J Clin Endocrinol Metab* 87:4177–4185
6. Kooh S, Noriega E, Leslie K, Muller C, Harrison J 1996 Bone mass and soft tissue composition in adolescents with anorexia nervosa. *Bone* 19:181–188
7. Robergeau K, Joseph J, Silber TJ 2006 Hospitalization of children and adolescents for eating disorders in the state of New York. *J Adolesc Health* 39:806–810
8. Lucas AR, Beard CM, O'Fallon WM, Kurland LT 1991 50-year trends in the incidence of anorexia nervosa in Rochester, MN: a population-based study. *Am J Psychiatry* 148:917–922
9. Castro J, Toro J, Lazaro L, Pons F, Halperin I 2002 Bone mineral density in male adolescents with anorexia nervosa. *J Am Acad Child Adolesc Psychiatry* 41:613–618
10. Carter DR, Bouxsein ML, Marcus R 1992 New approaches for interpreting projected bone densitometry data. *J Bone Miner Res* 7:137–145
11. Modan-Moses D, Yaroslavsky A, Novikov I, Segev S, Toledano A, Miterany E, Stein D 2003 Stunting of growth as a major feature of anorexia nervosa in male adolescents. *Pediatrics* 111:270–276
12. Katzman DK, Bachrach LK, Carter DR, Marcus R 1991 Clinical and anthropometric correlates of bone mineral acquisition in healthy adolescent girls. *J Clin Endocrinol Metab* 73:1332–1339

13. Jones G, Ma D, Cameron F 2006 Bone density interpretation and relevance in Caucasian children aged 9–17 years of age: insights from a population-based fracture study. *J Clin Densitom* 9:202–209
14. Leonard MB, Shults J, Elliott DM, Stallings VA, Zemel BS 2004 Interpretation of whole body dual energy X-ray absorptiometry measures in children: comparison with peripheral quantitative computed tomography. *Bone* 34:1044–1052
15. Cara J, Rosenfield R, Furlanetto R 1987 A longitudinal study of the relationship of plasma somatomedin-C concentration to the pubertal growth spurt. *Am J Dis Child* 141:562–564
16. Falahati-Nini A, Riggs BL, Atkinson EJ, O'Fallon WM, Eastell R, Khosla S 2000 Relative contributions of testosterone and estrogen in regulating bone resorption and formation in normal elderly men. *J Clin Invest* 106:1553–1560
17. Loucks AB 2003 Energy availability, not body fatness, regulates reproductive function in women. *Exerc Sport Sci Rev* 31:144–148
18. Loucks AB, Thuma JR 2003 Luteinizing hormone pulsatility is disrupted at a threshold of energy availability in regularly menstruating women. *J Clin Endocrinol Metab* 88:297–311
19. Kluge M, Schussler P, Uhr M, Yassouridis A, Steiger A 2007 Ghrelin suppresses secretion of luteinizing hormone in humans. *J Clin Endocrinol Metab* 92:3202–3205
20. Vulliamoz NR, Xiao E, Xia-Zhang L, Germond M, Rivier J, Ferin M 2004 Decrease in luteinizing hormone pulse frequency during a five-hour peripheral ghrelin infusion in the ovariectomized Rhesus monkey. *J Clin Endocrinol Metab* 89:5718–5723
21. Welt CK, Chan JL, Bullen J, Murphy R, Smith P, DePaoli AM, Karalis A, Mantzoros CS 2004 Recombinant human leptin in women with hypothalamic amenorrhea. *N Engl J Med* 351:987–997
22. Pinilla L, Fernandez-Fernandez R, Roa J, Castellano JM, Tena-Sempere M, Aguilar E 2007 Selective role of neuropeptide Y receptor subtype Y2 in the control of gonadotropin secretion in the rat. *Am J Physiol Endocrinol Metab* 293:E1385–E1392
23. Baldock PA, Sainsbury A, Couzens M, Enriquez RF, Thomas GP, Gardiner EM, Herzog H 2002 Hypothalamic Y2 receptors regulate bone formation. *J Clin Invest* 109:915–921
24. Burguera B, Hofbauer LC, Thomas T, Gori F, Evans GL, Khosla S, Riggs BL, Turner RT 2001 Leptin reduces ovariectomy-induced bone loss in rats. *Endocrinology* 142:3546–3553
25. Fukushima N, Hanada R, Teranishi H, Fukue Y, Tachibana T, Ishikawa H, Takeda S, Takeuchi Y, Fukumoto S, Kangawa K, Nagata K, Kojima M 2005 Ghrelin directly regulates bone formation. *J Bone Miner Res* 20:790–798
26. Kim SW, Her SJ, Park SJ, Kim D, Park KS, Lee HK, Han BH, Kim MS, Shin CS, Kim SY 2005 Ghrelin stimulates proliferation and differentiation and inhibits apoptosis in osteoblastic MC3T3–E1 cells. *Bone* 37:359–369
27. Lorentzon M, Landin K, Mellstrom D, Ohlsson C 2006 Leptin is a negative independent predictor of areal BMD and cortical bone size in young adult Swedish men. *J Bone Miner Res* 21:1871–1878
28. Misra M, Miller K, Tsai P, Gallagher K, Lin A, Lee N, Herzog D, Klibanski A 2006 Elevated peptide YY Levels in adolescent girls with anorexia nervosa. *J Clin Endocrinol Metab* 91:1027–1033
29. Reseland JE, Syversen U, Bakke I, Qvigstad G, Eide LG, Hjertner O, Gordeladze JO, Drevon CA 2001 Leptin is expressed in and secreted from primary cultures of human osteoblasts and promotes bone mineralization. *J Bone Miner Res* 16:1426–1433
30. Grinspoon S, Thomas E, Pitts S, Gross E, Mickley D, Miller K, Herzog D, Klibanski A 2000 Prevalence and predictive factors for regional osteopenia in women with anorexia nervosa. *Ann Intern Med* 133:790–794
31. Greulich W, Pyle S 1959 Radiographic atlas of skeletal development of the hand and wrist. 2nd ed. Stanford, CA: Stanford University Press
32. Kelly T, Specker B, Binkley T, Zemel B, Leonard M, Kalkwarf H, Moyer-Mileur L, Pan H, Cole T, Shepherd J 2005 Pediatric BMD reference database for U.S. white children. *Children's Bone Health Abstract*, Sorrento, Italy. *Bone* 36(Suppl 1):S30
33. Aaron DJ, Kriska AM, Dearwater SR, Cauley JA, Metz KF, LaPorte RE 1995 Reproducibility and validity of an epidemiologic questionnaire to assess past year physical activity in adolescents. *Am J Epidemiol* 142:191–201
34. Theintz G, Buchs B, Rizzoli R, Slosman D, Clavien H, Sizonenko P, Bonjour J 1992 Longitudinal monitoring of bone mass accumulation in healthy adolescents: evidence for a marked reduction after 16 years of age at the levels of lumbar spine and femoral neck in female subjects. *J Clin Endocrinol Metab* 75:1060–1065
35. Bachrach L 2001 Acquisition of optimal bone mass in childhood and adolescence. *Trends Endocrinol Metab* 12:22–28
36. Soyka L, Grinspoon S, Levitsky L, Herzog D, Klibanski A 1999 The effects of anorexia nervosa on bone metabolism in female adolescents. *J Clin Endocrinol Metab* 84:4489–4496
37. Pomerants T, Tillmann V, Jurimae J, Jurimae T 2007 The influence of serum ghrelin, IGF axis and testosterone on bone mineral density in boys at different stages of sexual maturity. *J Bone Miner Metab* 25:193–197
38. Sabatier JP, Guaydier-Souquieres G, Laroche D, Benmalek A, Fournier L, Guillon-Metz F, Delavenne J, Denis AY 1996 Bone mineral acquisition during adolescence and early adulthood: a study in 574 healthy females 10–24 years of age. *Osteoporos Int* 6:141–148
39. Riggs BL, Khosla S, Melton III LJ 2002 Sex steroids and the construction and conservation of the adult skeleton. *Endocr Rev* 23:279–302
40. Misra M, Miller KK, Cord J, Prabhakaran R, Herzog DB, Goldstein M, Katzman DK, Klibanski A 2007 Relationships between serum adipokines, insulin levels, and bone density in girls with anorexia nervosa. *J Clin Endocrinol Metab* 92:2046–2052
41. Misra M, Miller KK, Kuo K, Griffin K, Stewart V, Hunter E, Herzog DB, Klibanski A 2005 Secretory dynamics of ghrelin in adolescent girls with anorexia nervosa and healthy adolescents. *Am J Physiol Endocrinol Metab* 289: E347–E356
42. Misra M, Miller KK, Kuo K, Griffin K, Stewart V, Hunter E, Herzog DB, Klibanski A 2005 Secretory dynamics of leptin in adolescent girls with anorexia nervosa and healthy adolescents. *Am J Physiol Endocrinol Metab* 289: E373–E381
43. Misra M, Miller KK, Almazan C, Worley M, Herzog DB, Klibanski A 2005 Hormonal determinants of regional body composition in adolescent girls with anorexia nervosa and controls. *J Clin Endocrinol Metab* 90:2580–2587
44. Korpelainen R, Orava S, Karpakka J, Siira P, Hulkko A 2001 Risk factors for recurrent stress fractures in athletes. *Am J Sports Med* 29:304–310
45. Stafford DE 2005 Altered hypothalamic-pituitary-ovarian axis function in young female athletes: implications and recommendations for management. *Treat Endocrinol* 4:147–154
46. Chambry J, Corcos M, Guilbaud O, Jeammet P 2002 [Masculine anorexia nervosa: realities and perspectives]. *Ann Med Interne (Paris)* 153:1561–1567
47. Margo JL 1987 Anorexia nervosa in males. A comparison with female patients. *Br J Psychiatry* 151:80–83
48. Gordon CM, Goodman E, Emans SJ, Grace E, Becker KA, Rosen CJ, Gundberg CM, LeBoff MS 2002 Physiologic regulators of bone turnover in young women with anorexia nervosa. *J Pediatr* 141:64–70
49. Mora S, Pitukcheewanont P, Kaufman F, Nelson J, Gilsanz V 1999 Biochemical markers of bone turnover and the volume and the density of bone in children at different stages of sexual development. *J Bone Miner Res* 14:1664–1671
50. Misra M, Prabhakaran R, Miller KK, Goldstein MA, Mickley D, Claus L, Lockhart P, Cord J, Herzog DB, Katzman DK, Klibanski A 2007 Weight gain and restoration of menses as predictors of bone mineral density change in adolescent girls with anorexia nervosa-1. *J Clin Endocrinol Metab* 93: 1231–1237
51. Ohlsson C, Bengtsson B, Isaksson O, Andreassen T, Slootweg M 1998 Growth hormone and bone. *Endocr Rev* 19:55–79
52. Nussbaum M, Baird D, Sonnenblick M, Cowan K, Shenker IR 1985 Short stature in anorexia nervosa patients. *J Adolesc Health Care* 6:453–455
53. Root AW, Powers PS 1983 Anorexia nervosa presenting as growth retardation in adolescents. *J Adolesc Health Care* 4:25–30
54. Wren TA, Liu X, Pitukcheewanont P, Gilsanz V 2005 Bone densitometry in pediatric populations: discrepancies in the diagnosis of osteoporosis by DXA and CT. *J Pediatr* 146:776–779
55. Bolotin HH, Sievanen H, Grashuis JL 2003 Patient-specific DXA bone mineral density inaccuracies: quantitative effects of nonuniform extraosseous fat distributions. *J Bone Miner Res* 18:1020–1027
56. Evans EM, Mojtahedi MC, Kessinger RB, Misis MM 2006 Simulated change in body fatness affects Hologic QDR 4500A whole body and central DXA bone measures. *J Clin Densitom* 9:315–322
57. Mayo-Smith W, Rosenthal DI, Goodsitt MM, Klibanski A 1989 Intravertebral fat measurement with quantitative CT in patients with Cushing disease and anorexia nervosa. *Radiology* 170:835–838
58. Mayo-Smith W, Hayes CW, Biller BM, Klibanski A, Rosenthal H, Rosenthal DI 1989 Body fat distribution measured with CT: correlations in healthy subjects, patients with anorexia nervosa, and patients with Cushing syndrome. *Radiology* 170:515–518
59. Klibanski A, Biller B, Schoenfeld D, Herzog D, Saxe V 1995 The effects of estrogen administration on trabecular bone loss in young women with anorexia nervosa. *J Clin Endocrinol Metab* 80:898–904
60. Milos G, Spindler A, Rueggsegger P, Seifert B, Muhlebach S, Uebelhart D, Hauselmann HJ 2005 Cortical and trabecular bone density and structure in anorexia nervosa. *Osteoporos Int* 16:783–790
